# Supplementary material for: Faster 3D saturation-recovery based myocardial T1 mapping using a reduced number of saturation points and denoising
Source: PubMed Central journal article supplement (PMC7147792; doi:10.1371/journal.pone.0221071), 2020-04-10

Supporting Information Figure S1:

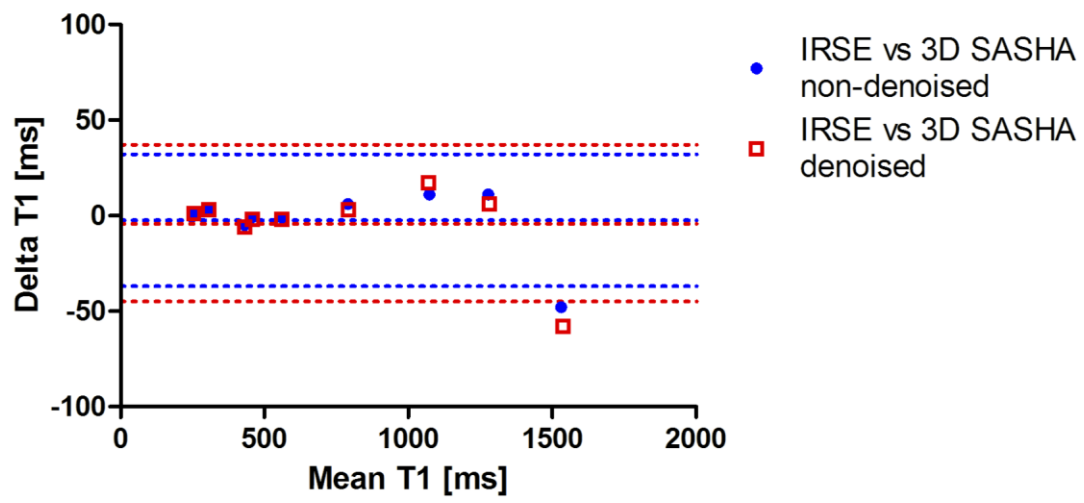

Supplement: pone.0221071.s001.pdf [file pone.0221071.s001.pdf]
